# Supplementary material for: Discrepancies in the Tumor Microenvironment of Spontaneous and Orthotopic Murine Models of Pancreatic Cancer Uncover a New Immunostimulatory Phenotype for B Cells
Source: PubMed Central journal article supplement (PMC6445859; doi:10.3389/fimmu.2019.00542), 2019-03-27

# Supplementary Figure 1 A-D

A

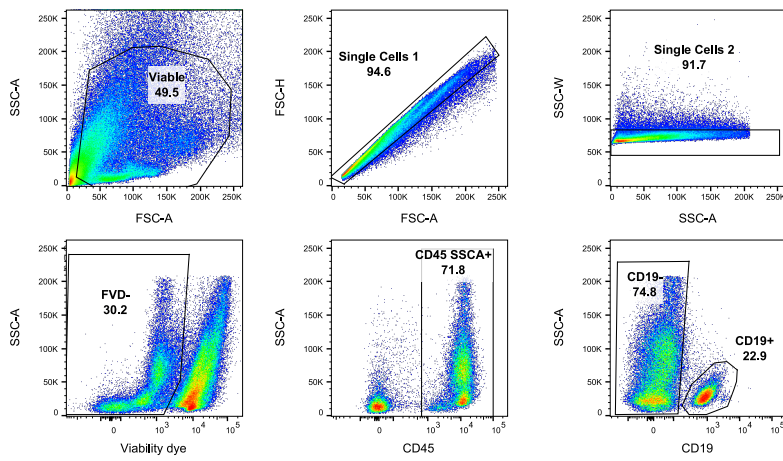

B

KPC tumor E-Cadherin low area

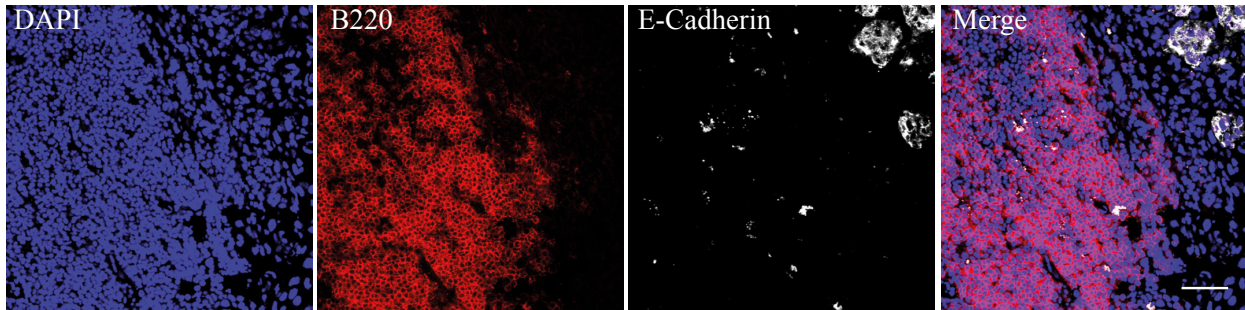

KPC tumor E-Cadherin rich area

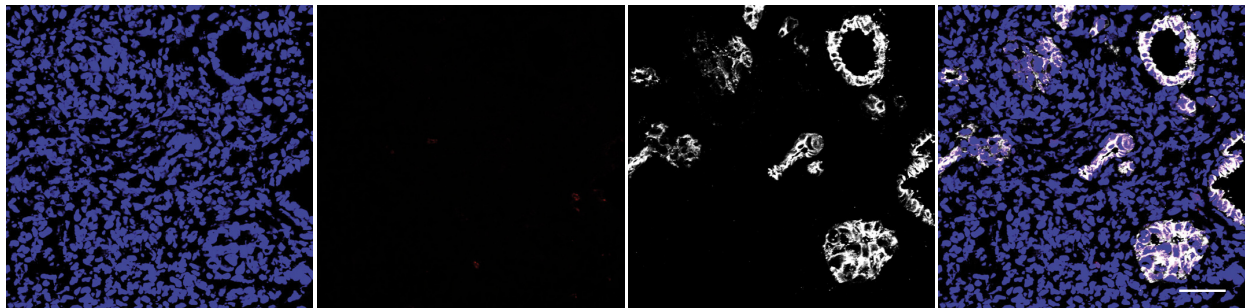

C

B220 in orthotopic tumor

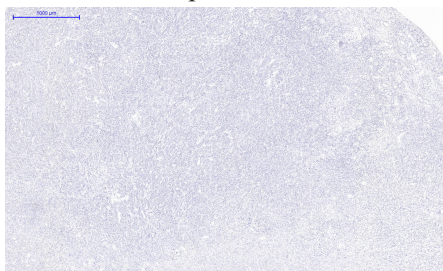

Positive control: B220 in spleen

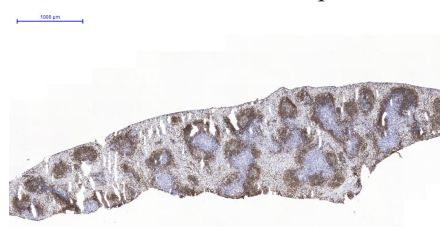

D

Orthotopic tumors

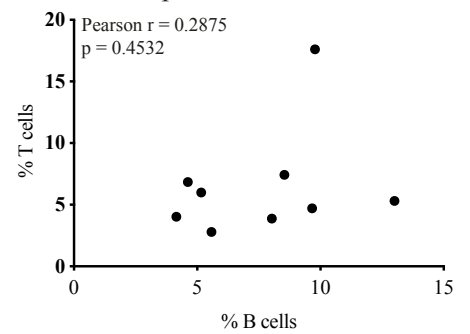

Supplementary Figure 1 E-Q

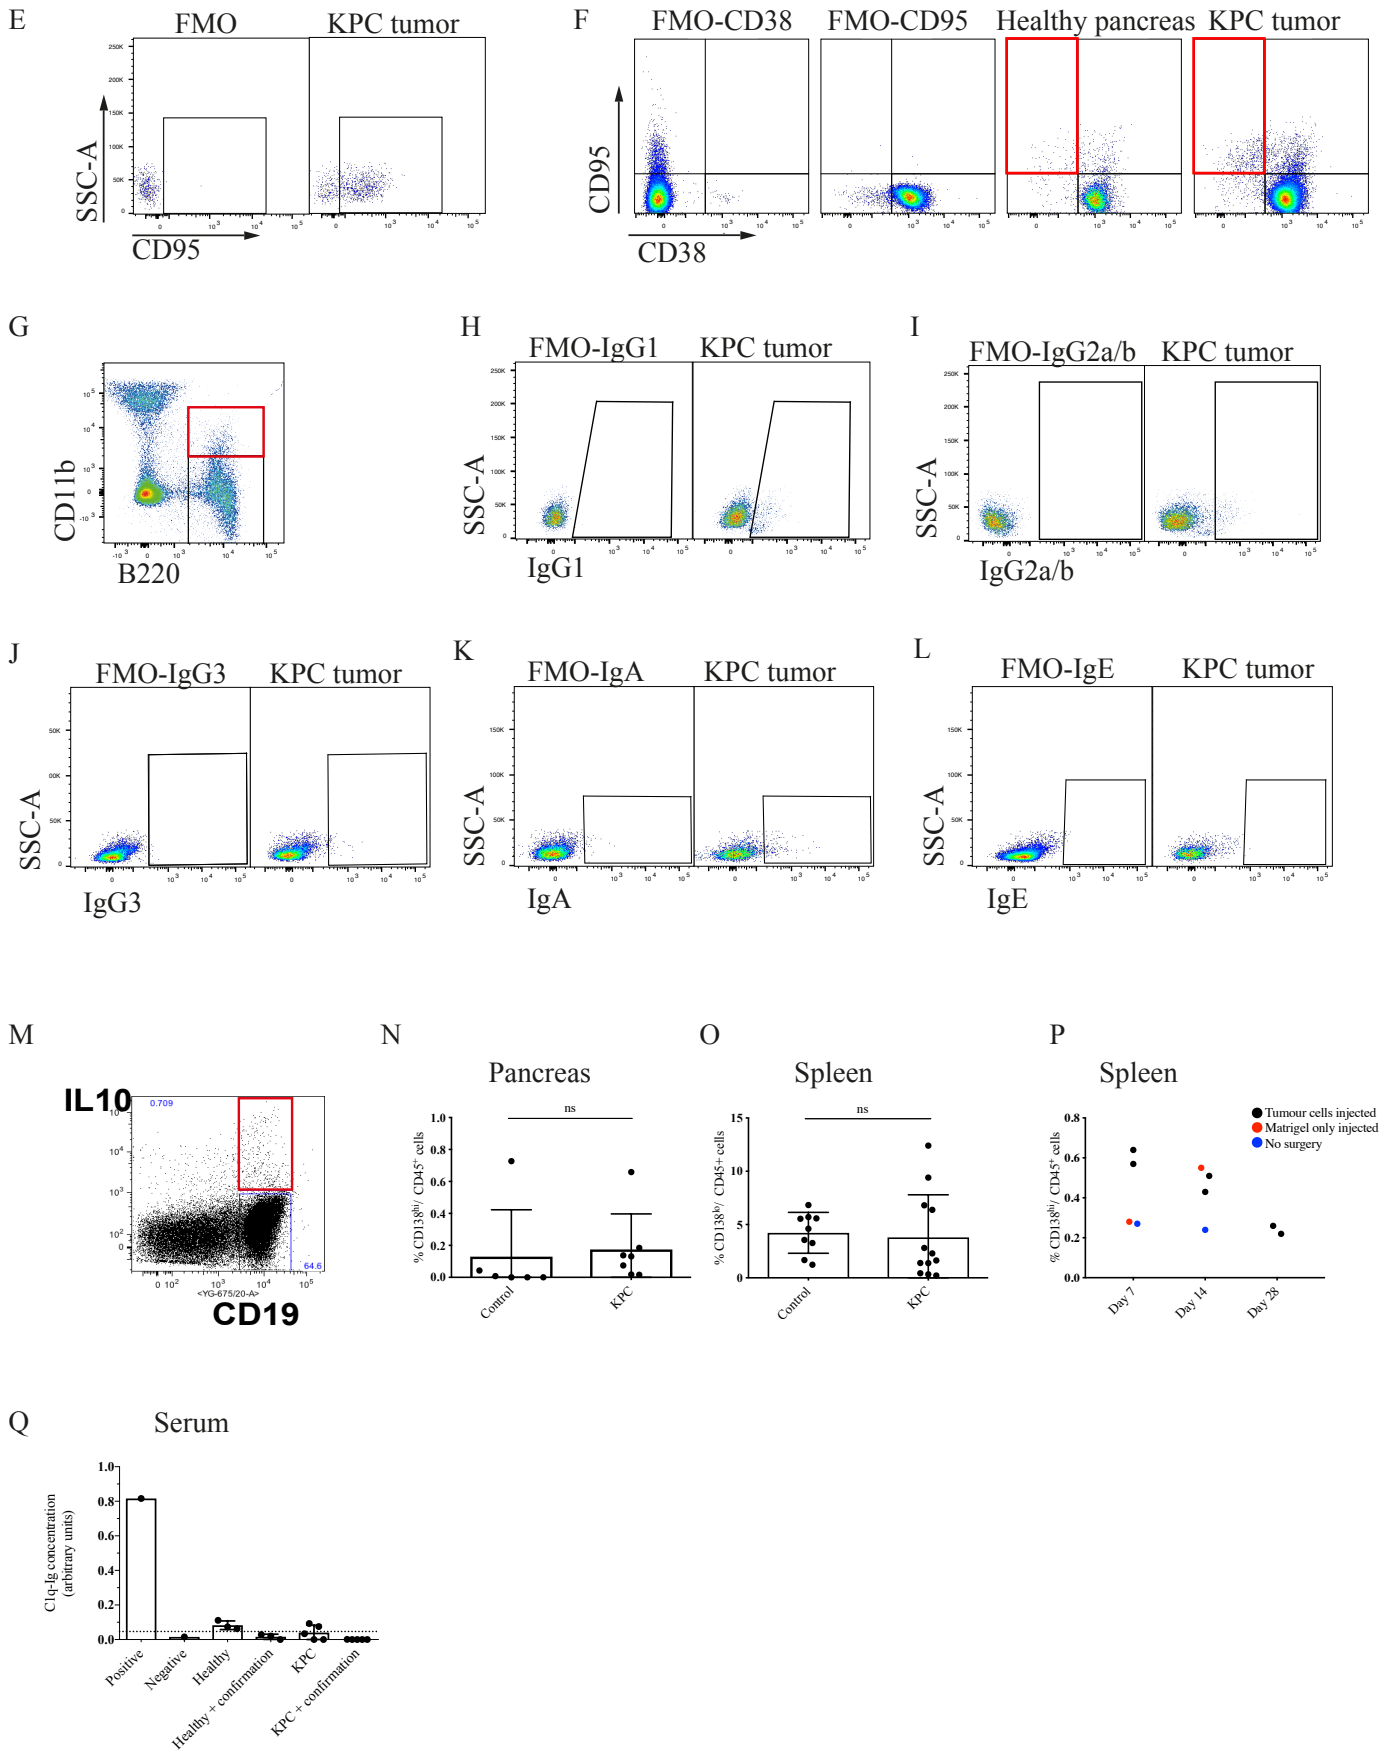

Supplement: Image_1.pdf [file Image_1.pdf]
