# Supplementary material for: Discrepancies in the Tumor Microenvironment of Spontaneous and Orthotopic Murine Models of Pancreatic Cancer Uncover a New Immunostimulatory Phenotype for B Cells
Source: PubMed Central journal article supplement (PMC6445859; doi:10.3389/fimmu.2019.00542), 2019-03-27

Supplementary Figure 4

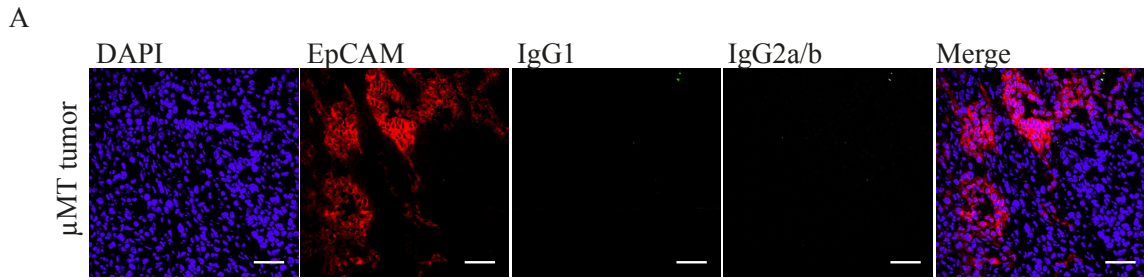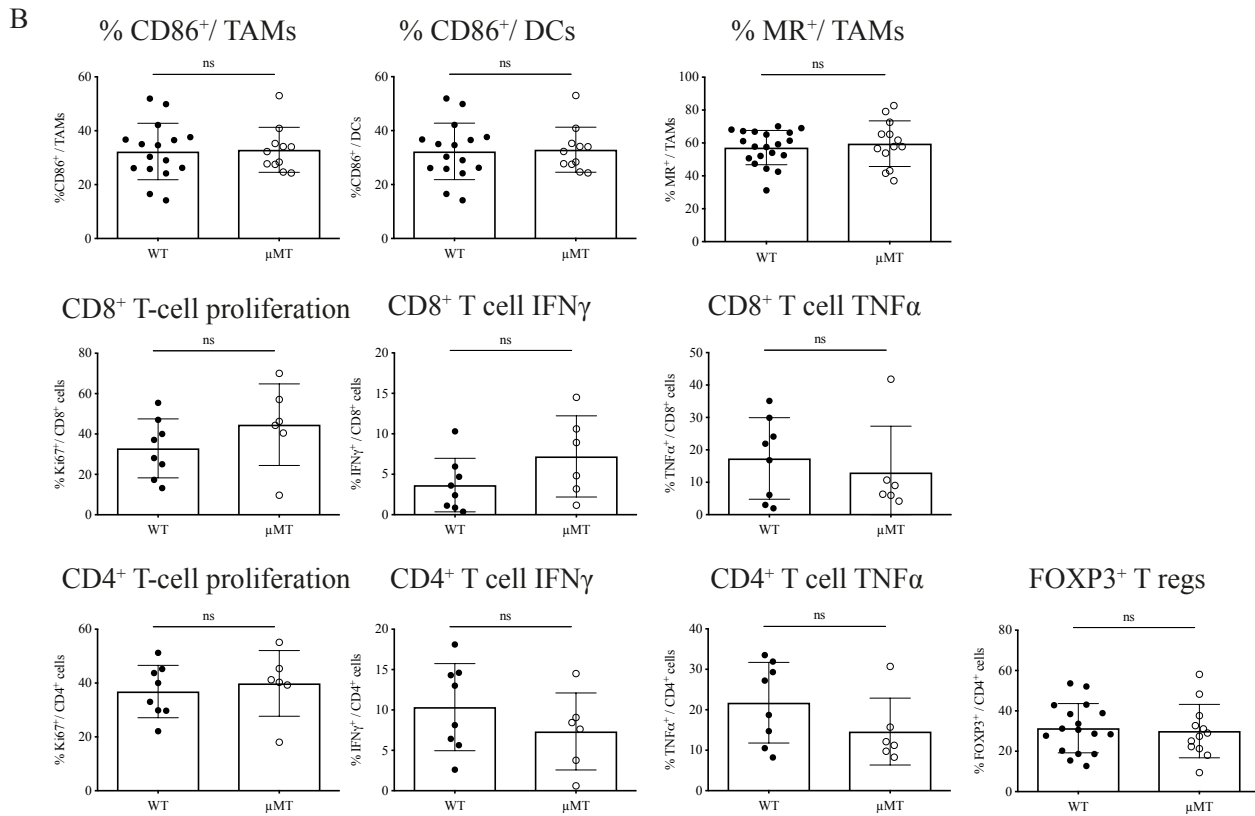

**C** B220 staining (brown) in anti-CD20 treated orthotopic tumors

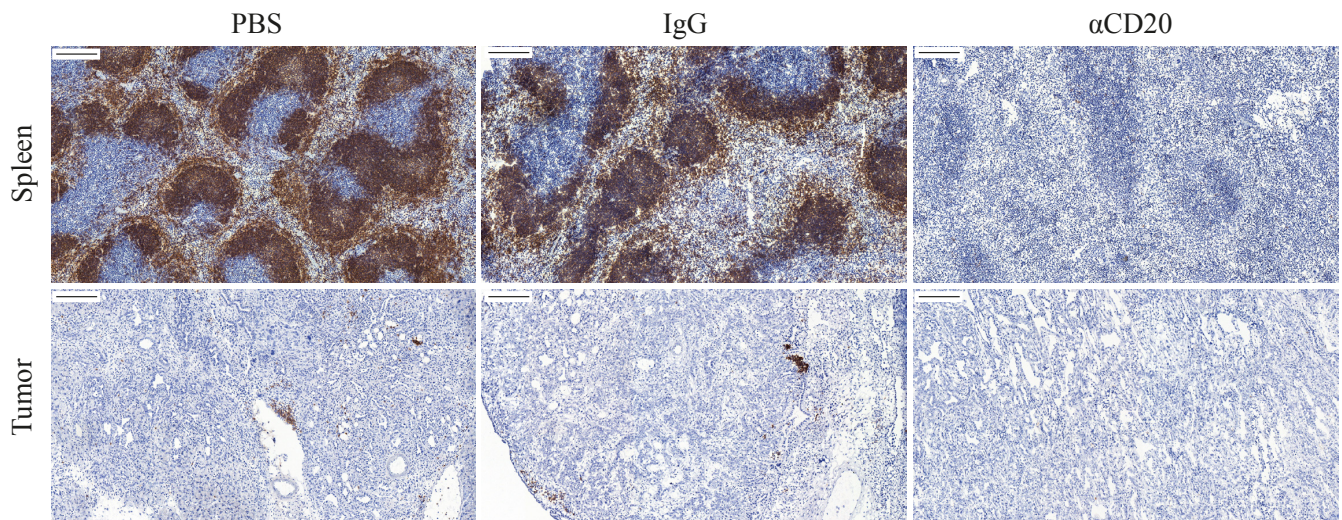

Supplement: Image_4.pdf [file Image_4.pdf]
