# Supplementary material for: Discrepancies in the Tumor Microenvironment of Spontaneous and Orthotopic Murine Models of Pancreatic Cancer Uncover a New Immunostimulatory Phenotype for B Cells
Source: PubMed Central journal article supplement (PMC6445859; doi:10.3389/fimmu.2019.00542), 2019-03-27

### Supplementary Figure 5 A-C

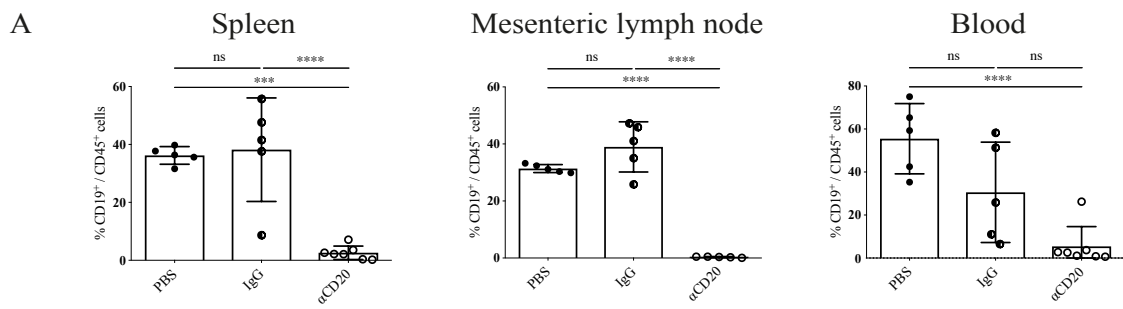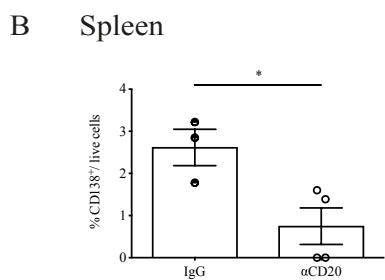

**C** Immunoglobulin deposition in tumors

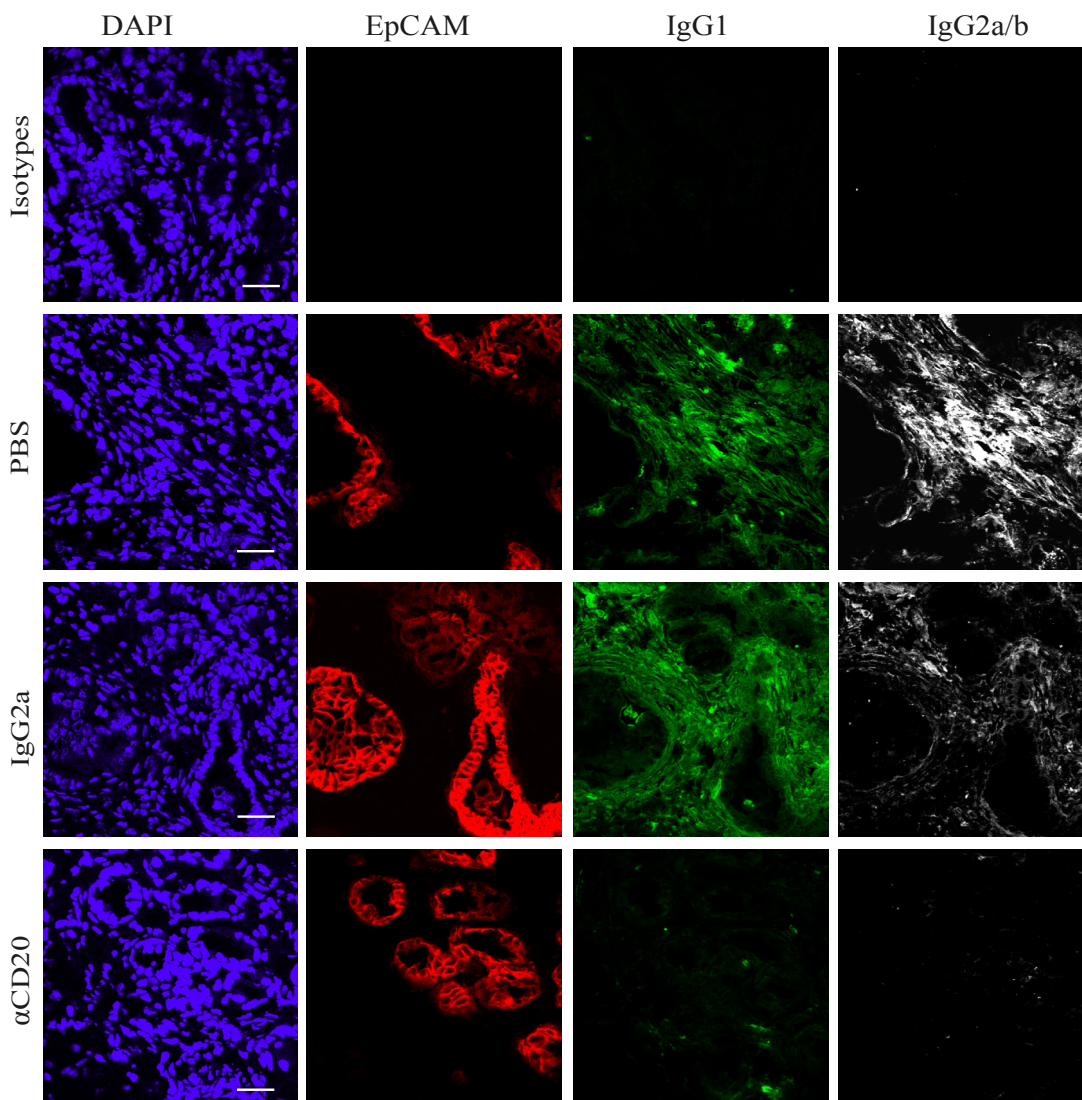

# Supplementary Figure 5 D-G

D

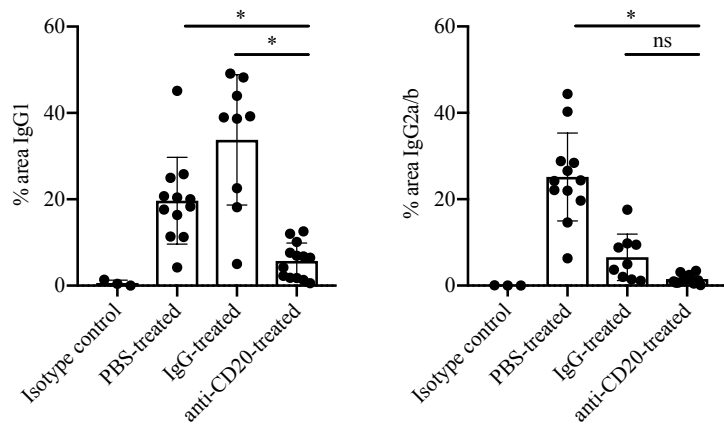

E

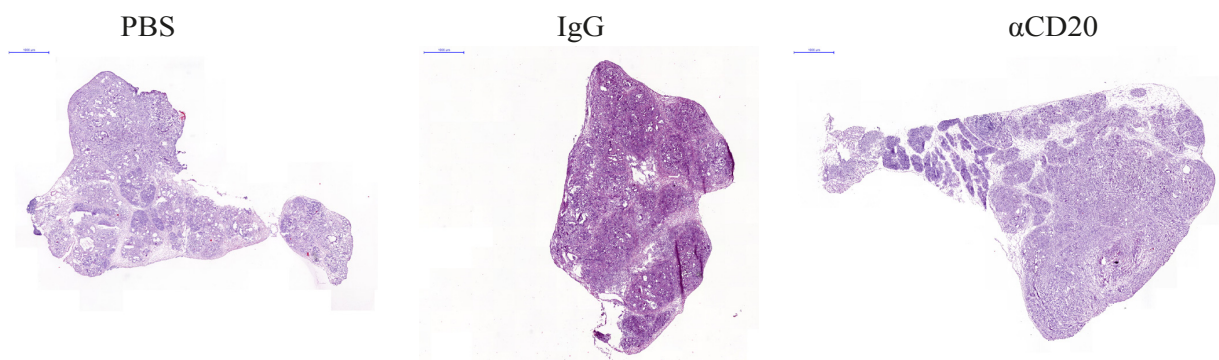

F

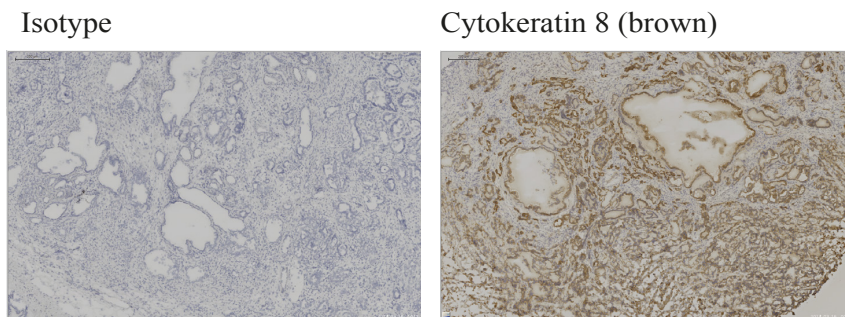

G

## Tumor infiltrate flow cytometry analysis

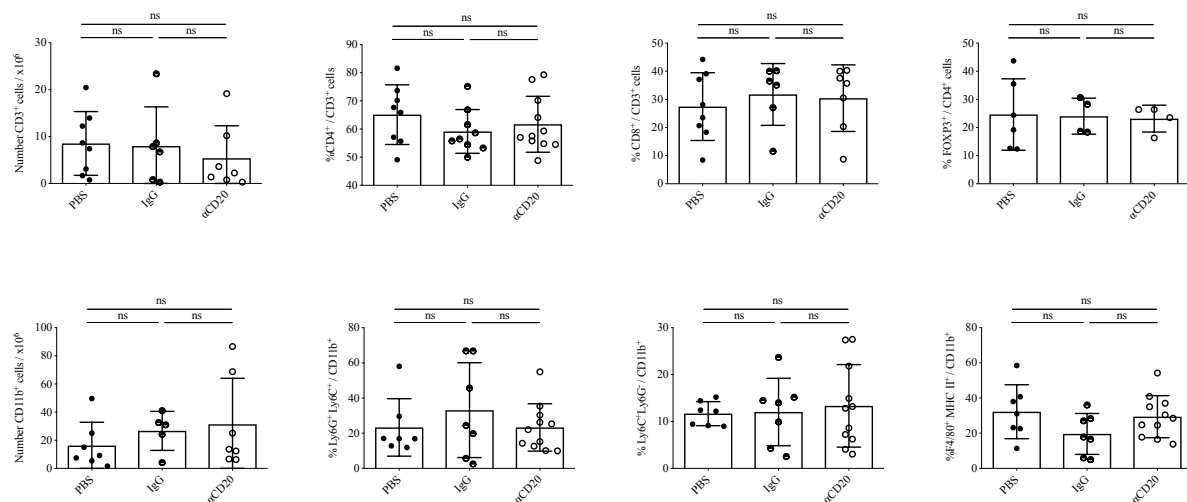

Supplement: Image_5.pdf [file Image_5.pdf]
