# Supplementary material for: Discrepancies in the Tumor Microenvironment of Spontaneous and Orthotopic Murine Models of Pancreatic Cancer Uncover a New Immunostimulatory Phenotype for B Cells
Source: PubMed Central journal article supplement (PMC6445859; doi:10.3389/fimmu.2019.00542), 2019-03-27
Supplement: Table_1.pdf [file Table_1.pdf]

## Supplementary Tables

**Supplementary Table S1: Antibodies used for flow cytometry**

| <b>Antibody</b> | <b>Fluorochrome</b>  | <b>Clone</b> | <b>Company</b> | <b>Catalogue number</b> |
|-----------------|----------------------|--------------|----------------|-------------------------|
| CD107a          | PE                   | 1D4B         | Biolegend      | 121612                  |
| CD11b           | Alexa Fluor 700      | M1/70        | eBioscience    | 56-0112                 |
| CD11b           | APC                  | M1/70        | eBioscience    | 17-0112-83              |
| CD11b           | Brilliant Violet 650 | M1/70        | Biolegend      | 101239                  |
| CD11c           | Brilliant Violet 650 | N418         | Biolegend      | 117339                  |
| CD138           | PE                   | 281-2        | Biolegend      | 142504                  |
| CD138           | PE                   | 281-2        | BD             | 553714                  |
| CD19            | Alexa Fluor 647      | 6D5          | Biolegend      | 115522                  |
| CD19            | FITC                 | eBIO1D3      | eBioscience    | 11-0193-82              |
| CD19            | PerCP-Cy5.5          | 6D5          | Biolegend      | 115534                  |
| CD19            | PerCP-Cy5.5          | eBio1D3      | eBioscience    | 45-0193                 |
| CD19            | PE/Cy5               | eBio1D3      | eBioscience    | 15-0193-83              |
| CD206/<br>MR    | PE                   | C068C2       | Biolegend      | 141706                  |
| CD206/<br>MR    | PE/Cy7               | C068C2       | Biolegend      | 141719                  |
| CD206/<br>MR    | APC                  | C068C2       | Biolegend      | 141708                  |
| CD3             | PerCP-eFluor 710     | 17A2         | eBioscience    | 46-0032-82              |

|                |                      |           |             |                 |
|----------------|----------------------|-----------|-------------|-----------------|
| CD3            | APC                  | 17A2      | Biolegend   | 100236          |
| CD38           | PerCP-eFluor 710     | 90        | eBioscience | 46-0381-80      |
| CD4            | FITC                 | GK1.5     | eBioscience | 11-0041         |
| CD4            | PerCP-Cy5.5          | RM4-5     | eBioscience | 45-0042         |
| CD4            | PerCP-Cy5.5          | RM4-5     | Biolegend   | 100540          |
| CD45           | Brilliant Violet 605 | 30-F11    | Biolegend   | 103140          |
| CD45R/B<br>220 | PE                   | RA3-6B2   | eBioscience | 12-0452         |
| CD45R/B<br>220 | PerCP-Cy5.5          | RA3-6B2   | eBioscience | 45-0452         |
| CD64/<br>FcγRI | PE                   | X54-5/7.1 | Biolegend   | 139304          |
| CD86           | PerCP/Cy5.5          | GL-1      | Biolegend   | 105027          |
| CD8a           | Brilliant Violet 421 | 53-6.7    | Biolegend   | 100738          |
| F4/80          | PE/Cy7               | BM8       | Biolegend   | 123114          |
| F4/80          | Brilliant Violet 650 | BM8       | Biolegend   | 123149          |
| F4/80          | Brilliant Violet 421 | BM8       | Biolegend   | 123137          |
| FOXP3          | APC                  | FJK-16s   | eBioscience | 17-5773-82      |
| GL7            | FITC                 | GL7       | Biolegend   | 144604          |
| IFN-γ          | PE/Cy7               | XMG1.2    | Biolegend   | 505826          |
| IgG1           | FITC                 | X-56      | Miltenyi    | 130-095-<br>897 |

|                  |                      |             |                |             |
|------------------|----------------------|-------------|----------------|-------------|
| IgG2ab           | APC                  | X-57        | Miltenyi       | 130-095-875 |
| IgG3             | FITC                 | R40-82      | BD Biosciences | 553403      |
| IgA              | FITC                 | C10-3       | BD Biosciences | 559354      |
| IL-10            | PE                   | JES5-16E3   | eBioscience    | 12-7101-82  |
| Ki67             | PE/Cy7               | SolA15      | eBioscience    | 25-5698     |
| Ly6C             | e-Fluor 450          | HK1.4       | eBioscience    | 48-5932     |
| Ly6C             | Brilliant Violet 785 | HK1.4       | Biolegend      | 128041      |
| Ly6G             | FITC                 | RB6-8C5     | eBioscience    | 11-5931     |
| Ly6G             | PerCP-Cy5.5          | 1A8         | Biolegend      | 127616      |
| MHC II (I-A/I-E) | APC/Cy7              | M5/114.15.2 | Biolegend      | 107628      |
| TNF- $\alpha$    | Alexa Fluor 647      | MP6-X       | Biolegend      | 506314      |
