# Supplementary material for: Discrepancies in the Tumor Microenvironment of Spontaneous and Orthotopic Murine Models of Pancreatic Cancer Uncover a New Immunostimulatory Phenotype for B Cells
Source: PubMed Central journal article supplement (PMC6445859; doi:10.3389/fimmu.2019.00542), 2019-03-27
Supplement: Table_2.pdf [file Table_2.pdf]

**Supplementary Table S2: Antibodies used in immunofluorescence and immunohistochemistry**

| <b>Species raised in</b> | <b>Antibody</b> | <b>Fluoro-chrome</b> | <b>Clone</b> | <b>Company</b> | <b>Catalogue Number</b> |
|--------------------------|-----------------|----------------------|--------------|----------------|-------------------------|
| Rat                      | B220            | Purified             | RA3-6B2      | BD Biosciences | 550286                  |
| Mouse                    | FcγRI           | PE                   | X54-5/7.1    | Biolegend      | 139304                  |
| Rabbit                   | CK8             | Purified             | Polyclonal 1 | Abcam          | 59400                   |
| Rat                      | E-Cadherin      | eFluor 660           | DECMA-1      | eBioscience    | 50-3249                 |
| Rat                      | EpCAM           | PE                   | G8.8         | eBioscience    | 12-5791                 |
| Rat                      | F4/80           | Alexa Fluor 488      | BM8          | eBioscience    | 53-4801-82              |
| Rat                      | F4/80           | Purified             | Cl: A3-1     | AbD Serotec    | MCA497                  |
| Rat                      | IgG1            | FITC                 | X-56         | Miltenyi       | 130-095-897             |
| Rat                      | IgG2ab          | APC                  | X-57         | Miltenyi       | 130-095-875             |
| Rat                      | IgG3            | FITC                 | R40-82       | BD Biosciences | 553403                  |
| Rat                      | IgM             | APC                  | II/41        | eBioscience    | 17-5790-80              |
