# Supplementary material for: Discrepancies in the Tumor Microenvironment of Spontaneous and Orthotopic Murine Models of Pancreatic Cancer Uncover a New Immunostimulatory Phenotype for B Cells
Source: PubMed Central journal article supplement (PMC6445859; doi:10.3389/fimmu.2019.00542), 2019-03-27
Supplement: Table_3.pdf [file Table_3.pdf]

**Supplementary Table S3: Isotype antibody controls used in immunofluorescence and immunohistochemistry**

| <b>Species</b> | <b>Isotype</b> | <b>Fluoro-chrome</b> | <b>Clone</b> | <b>Company</b> | <b>Catalogue Number</b> |
|----------------|----------------|----------------------|--------------|----------------|-------------------------|
| Rat            | IgG1 $\kappa$  | APC                  | A110-1       | BD Biosciences | 550884                  |
| Rat            | IgG1 $\lambda$ | APC                  | R3-34        | BD Biosciences | 554686                  |
| Rat            | IgG1 $\kappa$  | FITC                 | eBRG1        | eBioscience    | 11-4301-81              |
| Mouse          | IgG1 $\kappa$  | PE                   | MOPC-21      | BD Biosciences | 555749                  |
| Rat            | IgG2a          | Alexa Fluor488       | 54447        | R&D            | IC006G                  |
| Rat            | IgG2a $\kappa$ | FITC                 | eBR2a        | eBioscience    | 11-4321                 |
| Rat            | IgG2a $\kappa$ | Purified             | RTK2758      | Biologend      | 400501                  |
| Rat            | IgG2a $\kappa$ | PE                   | eBR2a        | eBioscience    | 12-4321                 |
| Rabbit         | IgG            | Purified             | Polyclonal   | Cell Signaling | 3900S                   |
