# Supplementary material for: Discrepancies in the Tumor Microenvironment of Spontaneous and Orthotopic Murine Models of Pancreatic Cancer Uncover a New Immunostimulatory Phenotype for B Cells
Source: PubMed Central journal article supplement (PMC6445859; doi:10.3389/fimmu.2019.00542), 2019-03-27
Supplement: Table_4.pdf [file Table_4.pdf]

**Supplementary Table S4: Secondary antibodies used in immunohistochemistry**

| <b>Species raised in</b> | <b>Reactivity</b> | <b>Fluorochrome</b> | <b>Company</b> | <b>Catalogue Number</b> |
|--------------------------|-------------------|---------------------|----------------|-------------------------|
| Rabbit                   | Rat IgG           | Biotinylated        | Vector Labs    | BA-4001                 |
| Goat                     | Rabbit IgG        | Biotinylated        | Vector Labs    | BA-1000                 |
